# Supplementary material
Source: PubMed Central journal article supplement (PMC3952630)
Supplement: supp_blood-2010-12-325241_blood-2010-12-325241-1.pdf [file supp_blood-2010-12-325241_blood-2010-12-325241-1.pdf]

**Table S1.** Real-time PCR primers

| <b>Gene</b>                     | <b>Strand</b> | <b>Sequence</b>           | <b>Exon</b> |
|---------------------------------|---------------|---------------------------|-------------|
| <i>Tet2</i> (1)                 | F             | GTCAACAGGACATGATCCAGGAG   | 2           |
|                                 | R             | CCTGTTCCATCAGGCTTGCT      | 3           |
| <i>Tet2</i> (2)                 | F             | AGCCTGATGGAACAGGACAG      | 3           |
|                                 | R             | AACGGGCTTCCATTCTGGAG      | 3           |
| <i>Tet2</i> (3)                 | F             | CTCCTGGTGAACAAAGTCAGAATGG | 3           |
|                                 | R             | CTAATAGCTGCCACATCAGGACC   | 4           |
| <i>Tet2</i> (4)                 | F             | CCAAGACCAAGAAAGCAGCTCG    | 11          |
|                                 | R             | CCGAAAGCTGCGGTTGTGC       | 12          |
| <i>Tet1</i>                     | F             | CTGAGCCTGTTCTCGATGTGG     |             |
|                                 | R             | AGGTGAGAAGTAGATGAGGCTGATG |             |
| <i>Tet3</i>                     | F             | GGAGTTGGCTGGAGTCACCAC     |             |
|                                 | R             | CCACCGCATTGCCACTGTAC      |             |
| <i><math>\beta</math>-actin</i> | F             | TGAACCCTAAGGCCAACCGTGAAA  |             |
|                                 | R             | CAGGATGGCGTGAGGGAGAGCATAG |             |

**Table S2. Summary of tumor transfer experiments**

| <b>Donor<br/>SP cells</b>                                            | <b>Splenomegaly<br/>(%)</b> | <b>Neutrophilia<br/>and/or<br/>monocytosis</b> | <b>Latency<br/>(days)</b> |
|----------------------------------------------------------------------|-----------------------------|------------------------------------------------|---------------------------|
| <b>WT Control</b>                                                    | <b>0</b>                    | <b>0</b>                                       | <b>N/A</b>                |
| <b>Myeloid infiltration<br/>(<i>Tet2</i><sup>-/-</sup>, 2A45)</b>    | <b>75%</b>                  | <b>75%</b>                                     | <b>47-78</b>              |
| <b>Myeloid infiltration<br/>(<i>Tet2</i><sup>-/-</sup>, 2A19)</b>    | <b>100%</b>                 | <b>100%</b>                                    | <b>72-108</b>             |
| <b>Myeloid infiltration<br/>(<i>Tet2</i><sup>+/-</sup>, 2A102)</b>   | <b>100%</b>                 | <b>100%</b>                                    | <b>60-117</b>             |
| <b>Erythroid infiltration<br/>(<i>Tet2</i><sup>-/-</sup>, 2A57)</b>  | <b>0</b>                    | <b>0</b>                                       | <b>N/A</b>                |
| <b>Erythroid infiltration<br/>(<i>Tet2</i><sup>-/-</sup>, 2A116)</b> | <b>0</b>                    | <b>0</b>                                       | <b>N/A</b>                |

4 recipient mice/primary donor spleen cells.

**Table S3. Increased high proliferative progenitors in *Tet2*<sup>-/-</sup> LSK cells at single-cell level.**

| Mice                       | No. of Sorted LSK Cells | No. of Colonies |     |          |       |
|----------------------------|-------------------------|-----------------|-----|----------|-------|
|                            |                         | CFU-GM          | HPP | CFU-GEMM | Total |
| WT                         | 192                     | 22              | 46  | 8        | 76    |
| <i>Tet2</i> <sup>+/-</sup> | 192                     | 20              | 62  | 10       | 92    |
| <i>Tet2</i> <sup>-/-</sup> | 192                     | 32              | 96* | 8        | 136*  |

Single sorted BM LSK cells were cultured for 8 days in the presence of mSCF, hIL-6, mIL-3 and hEpo. The number of cells in each well was counted under phase-contrast microscope and cytopsin prepared in order to determine the colony types. HPP indicates GM-colonies contain >1000 cells; and CFU-GM indicates GM-colonies contain <1000 cells. Data shown are combined results from two separate experiments. \*Dramatically increased between WT or *Tet2*<sup>+/-</sup> mice and *Tet2*<sup>-/-</sup> mice.

**Figure S1. Levels of GFP (Tet2) expression in total cell preparations of various tissues/organs of *Tet2:nGFP* mouse.** 6-8-week old heterozygous *Tet2:GFP* mice were sacrificed and single cell suspensions of various organs/tissues were prepared using collagenase. GFP (Tet2) expression in total cell preparations of various tissues/organs of a representative *Tet2:nGFP* mouse are shown.

**Figure S2. The locations of each of the 4 primer pairs on Tet2 gene are shown**

**Figure S3. (A)** A moribund *Tet2<sup>+/-</sup>* mice developed MPD-like myeloid leukemia with myeloid sarcoma. Appearance of this *Tet2<sup>+/-</sup>* mouse with a large peritoneal mass and flow cytometric analysis of the cells within the mass are shown. **(B)** A moribund *Tet2<sup>-/-</sup>* mice (2A19) developed MPD-like myeloid leukemia with multiple white nodules in the liver. The gross morphology of liver and flow cytometric analysis of the cells within the nodules are shown.

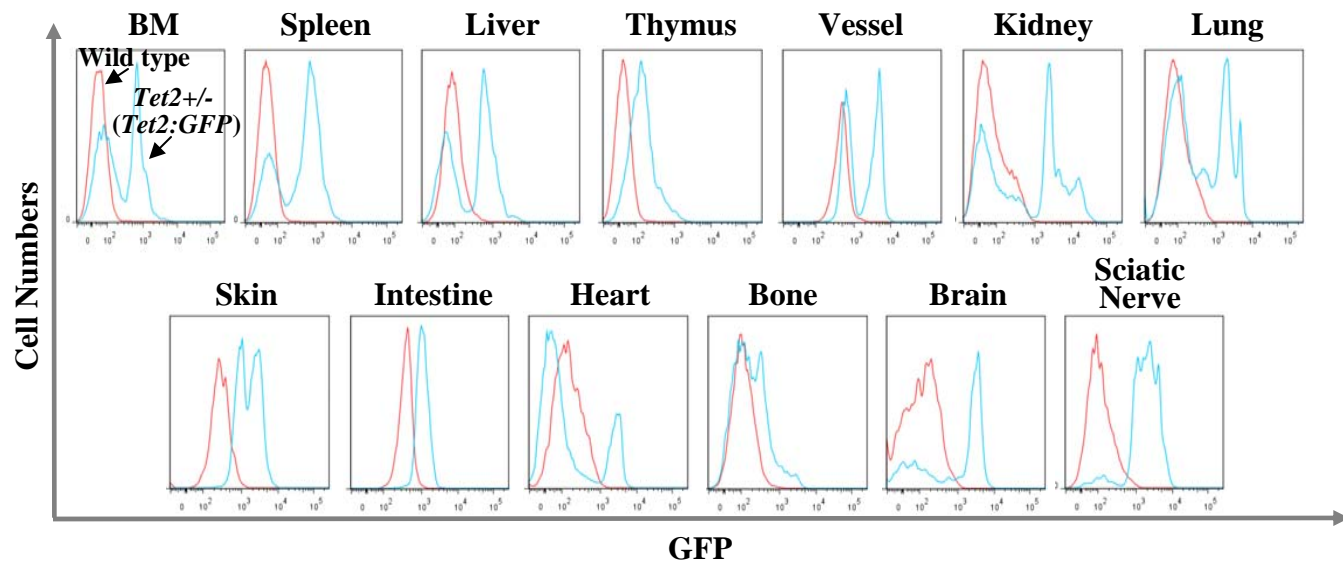

Figure S1

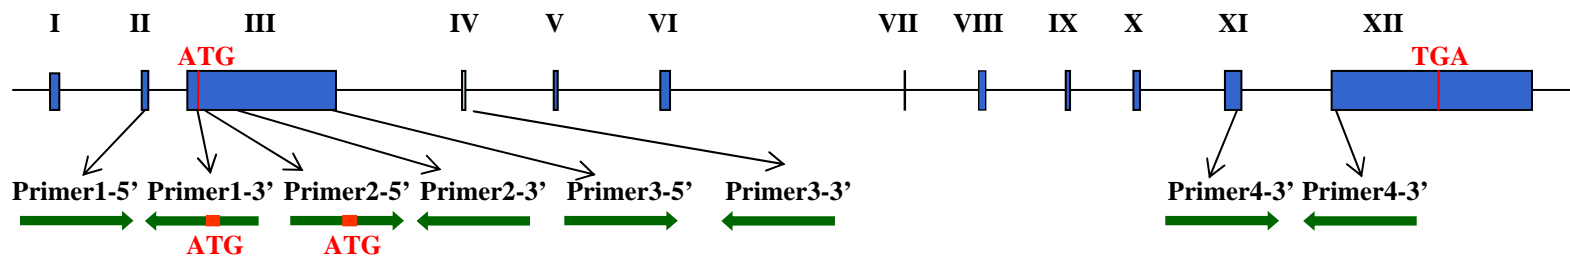

Figure S2

**A**

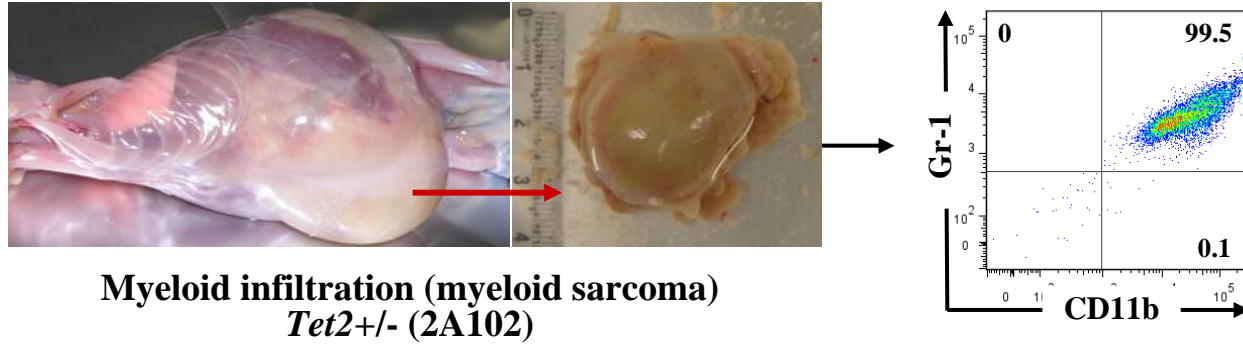

**B**

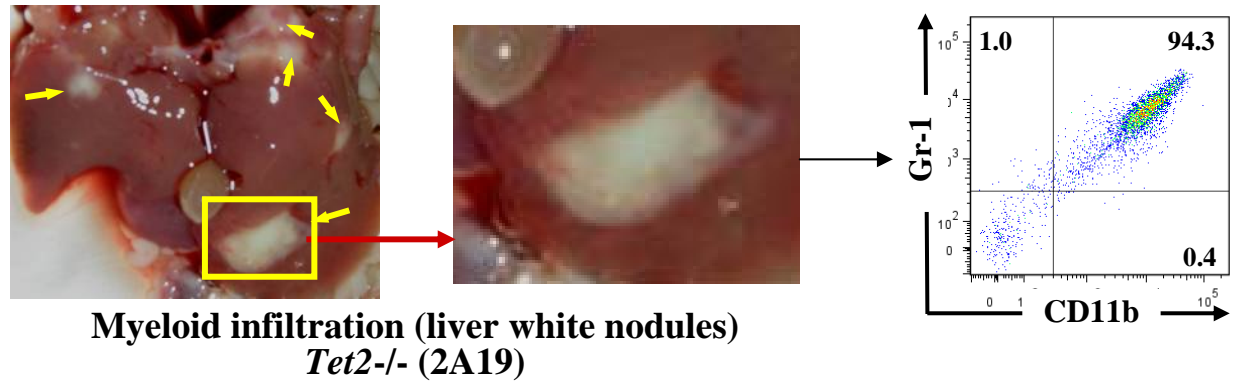

**Figure S3**
